# Supplementary material for: Unique structured microspheres with multishells comprising graphitic carbon-coated Fe3O4 hollow nanopowders as anode materials for high-performance Li-ion batteries
Source: Royal Society of Chemistry journal article supplement (doi:10.1039/c9ta04235k), 2019-01-01
Supplement: c9ta04235k1.pdf [file c9ta04235k1.pdf]

## SUPPLEMENTARY INFORMATION

### **Unique structured microspheres with multishells comprising graphitic carbon-coated Fe<sub>3</sub>O<sub>4</sub> hollow nanopowders as anode materials for high-performance Li-ion batteries**

Gi Dae Park<sup>a</sup>, Jeong Hoo Hong<sup>a</sup>, Dae Soo Jung<sup>b</sup> Jong-Heun Lee<sup>a</sup>, and Yun Chan Kang<sup>\*a</sup>

*<sup>a</sup>Department of Materials Science and Engineering, Korea University, Anam-Dong,  
Seongbuk-Gu, Seoul 136-713, Republic of Korea, E-mail: yckang@korea.ac.kr; Fax: (+82)  
2-928-3584*

*<sup>b</sup>Energy and Environmental Division, Korea Institute of Ceramic Engineering and  
Technology, Jinju 660-031, Republic of Korea.*

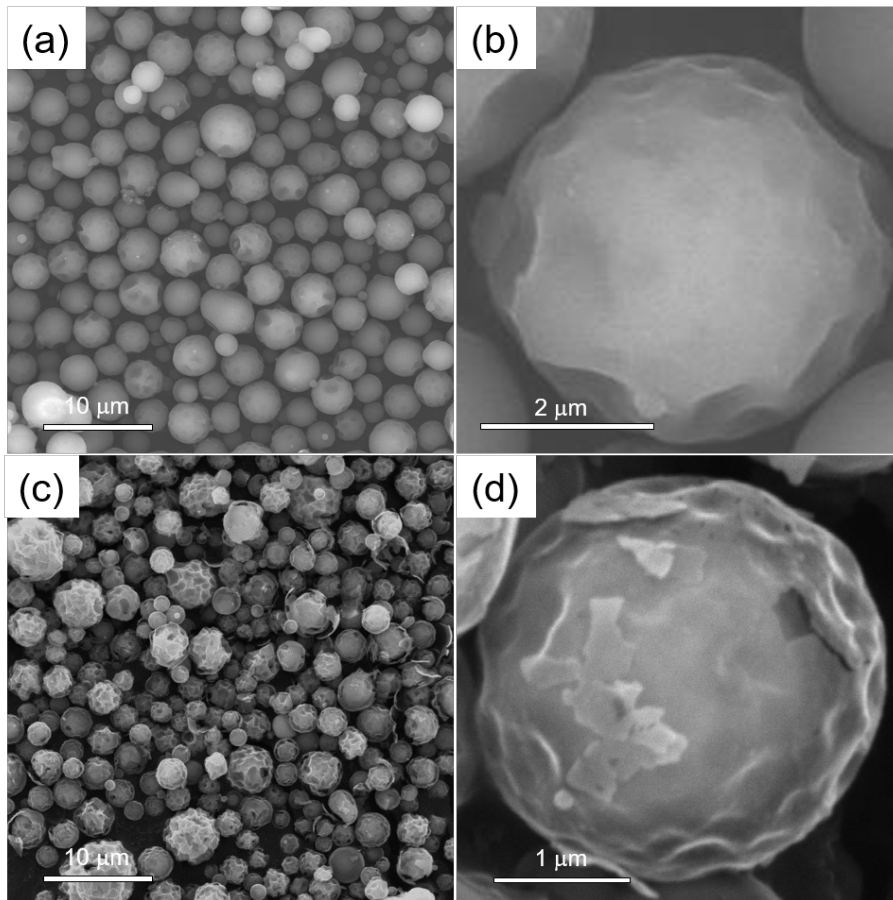

**Fig. S1** Morphologies of microspheres synthesized by spray drying process before and after post-treatment process. (a,b) as-prepared and (c,d) post-treated microspheres.

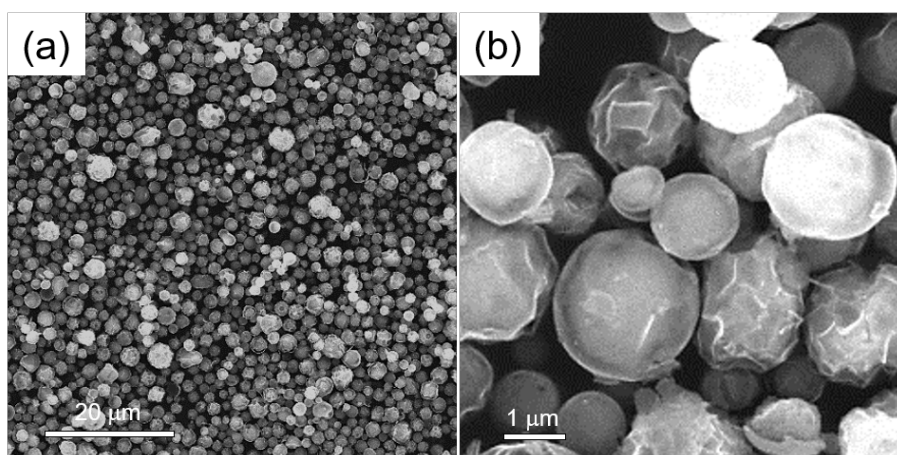

**Fig. S2** Morphologies of pitch infiltrated  $\text{Fe}_2\text{O}_3$  yolk-shell microspheres.

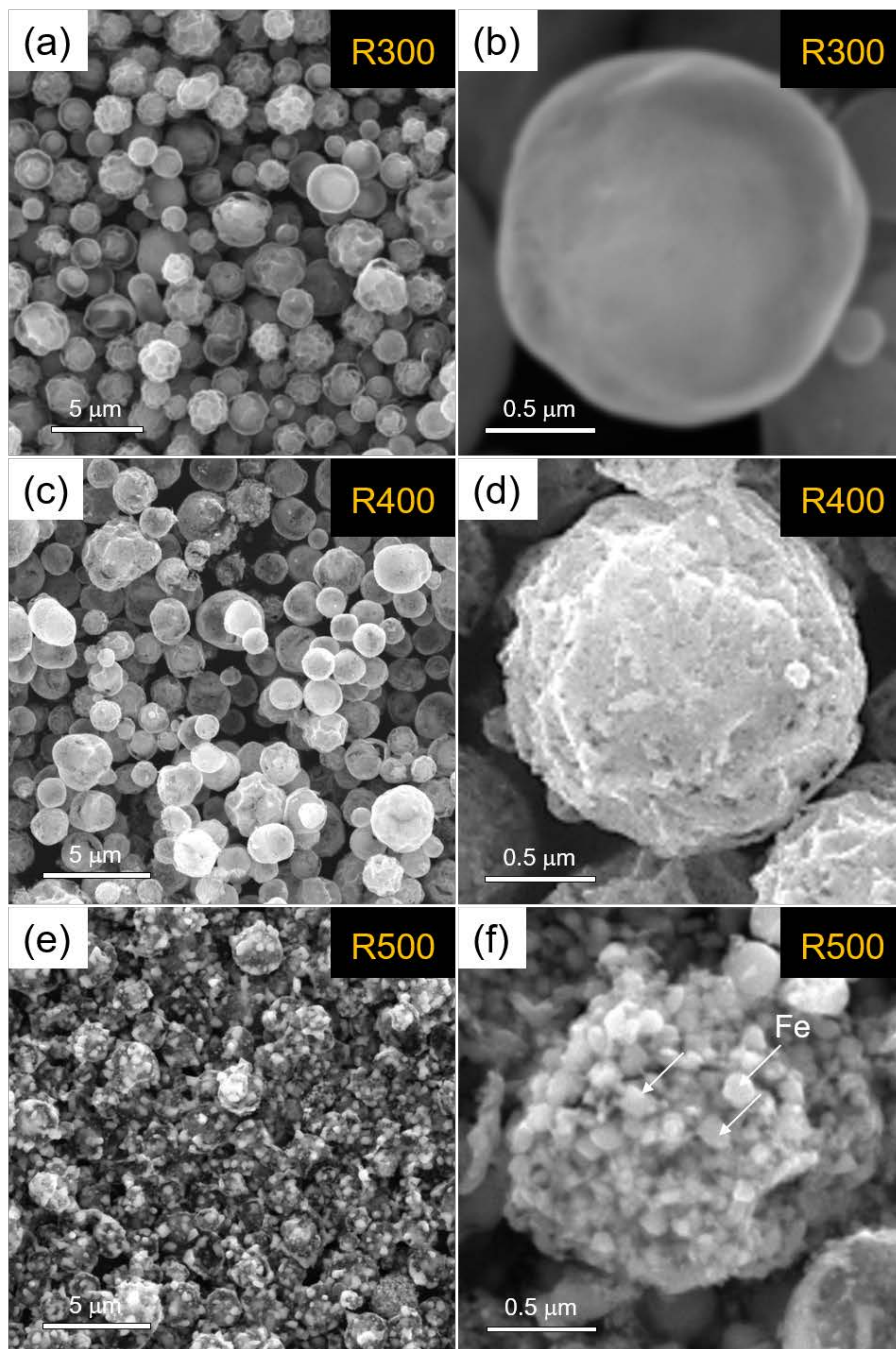

**Fig. S3** Morphologies of microspheres formed after reduction process of pitch-infiltrated  $\text{Fe}_2\text{O}_3$  yolk-shell microspheres at (a,b) 300 °C, (c,d) 400 °C, and (e,f) 500 °C.

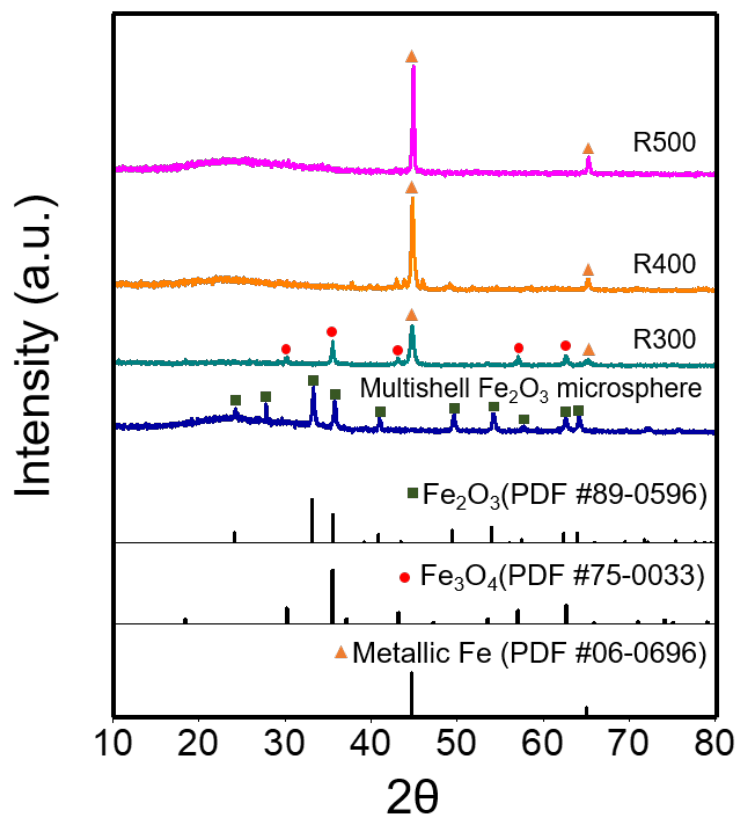

**Fig. S4** XRD patterns of microspheres obtained before and after reduction process at 300 (R300), 400 (R400) and 500 °C (R500).

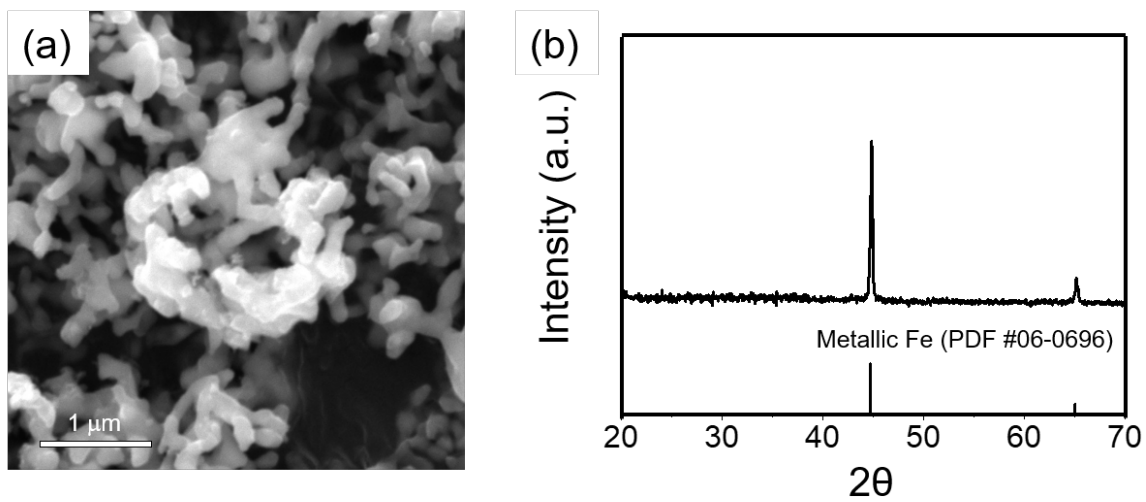

**Fig. S5** (a) Morphology and (b) XRD pattern of metallic Fe powders formed after reduction of  $\text{Fe}_2\text{O}_3$  yolk-shell microspheres at 400 °C.

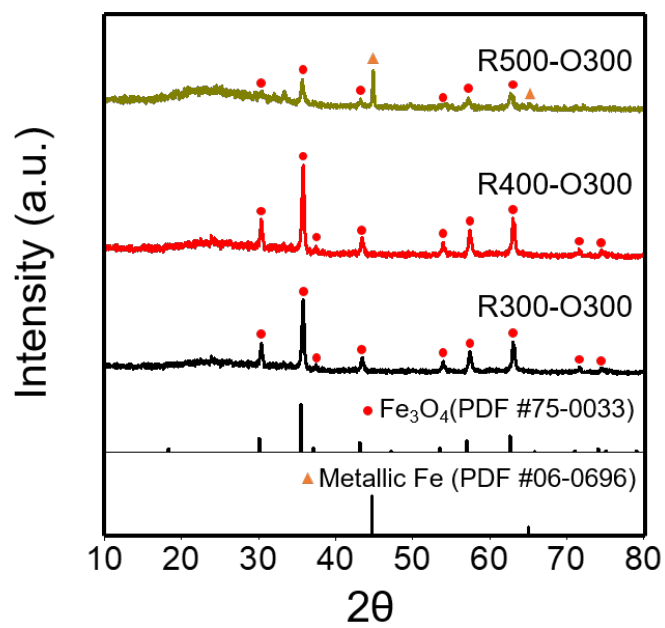

**Fig. S6** XRD patterns of R300-O300, R400-O300, and R500-O300 microspheres.

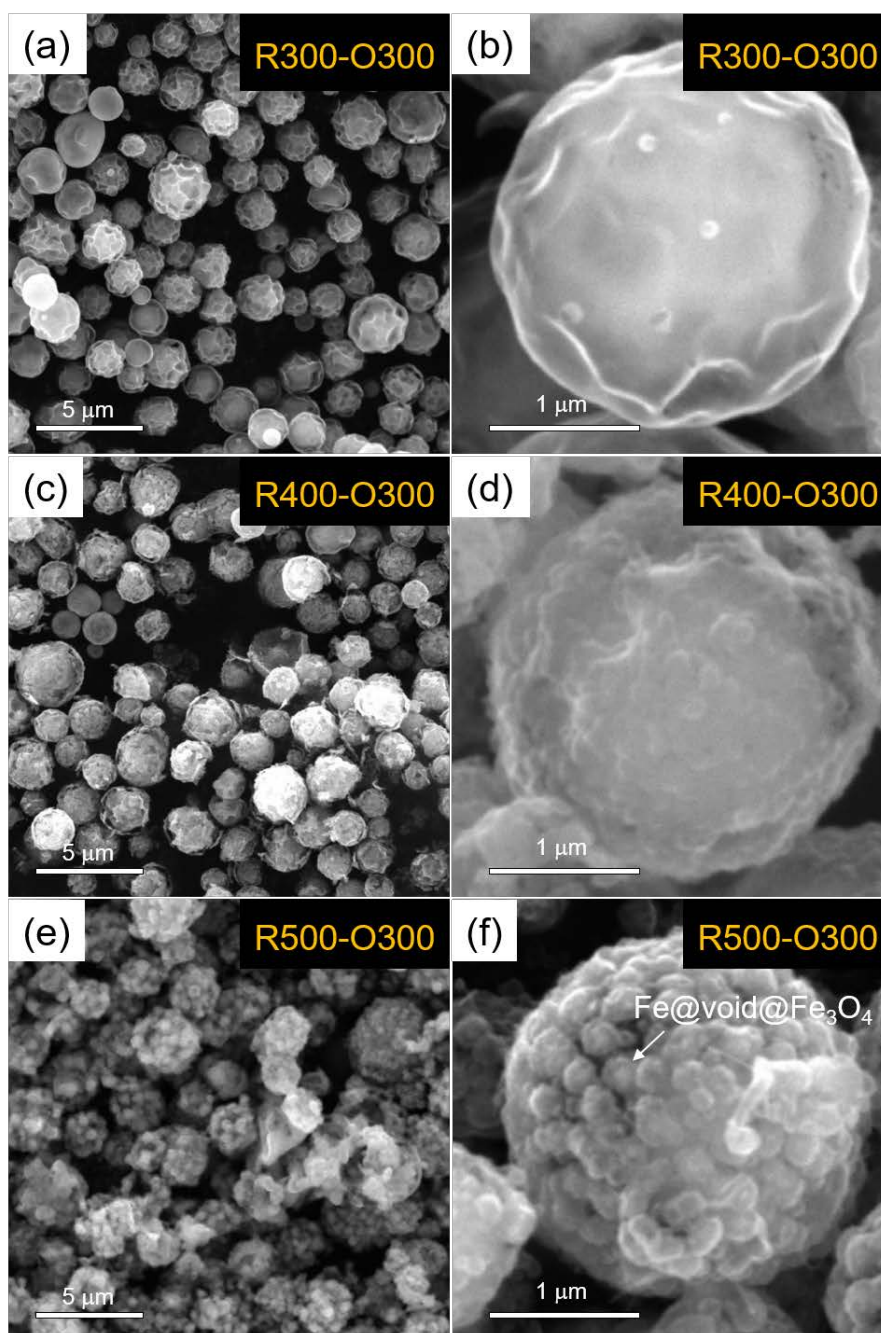

**Fig. S7** Morphologies of (a,b) R300-O300, (c,d) R400-O300, and (e,f) R500-O300 microspheres.



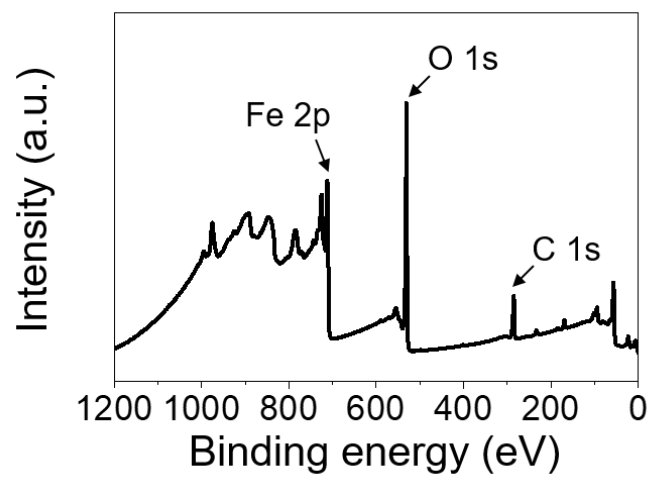

**Fig. S8** XPS survey scan of  $\text{Fe}_3\text{O}_4$ -GC (R400-O300) microspheres.

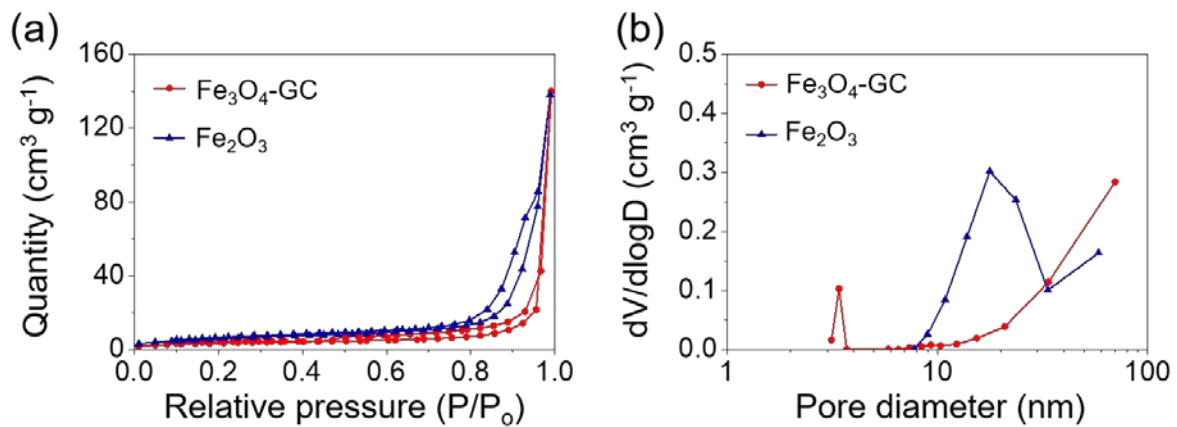

**Fig. S9** (a) N<sub>2</sub> gas adsorption and desorption isotherm and (b) BJH pore-size distribution of Fe<sub>3</sub>O<sub>4</sub>-GC (R400-O300) and bare Fe<sub>2</sub>O<sub>3</sub> microspheres.

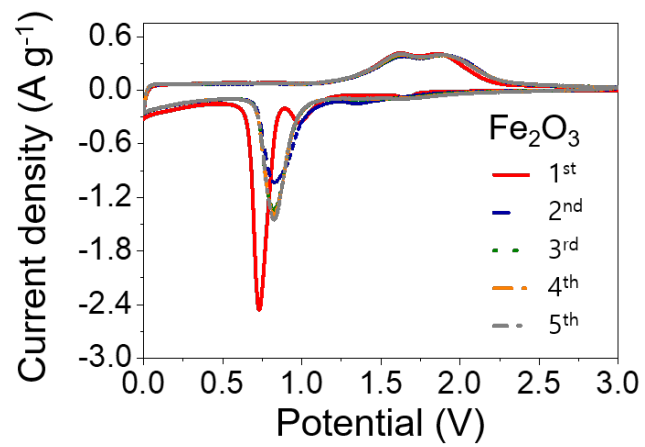

**Fig. S10** CV curves of yolk-shell structured Fe<sub>2</sub>O<sub>3</sub> microspheres.

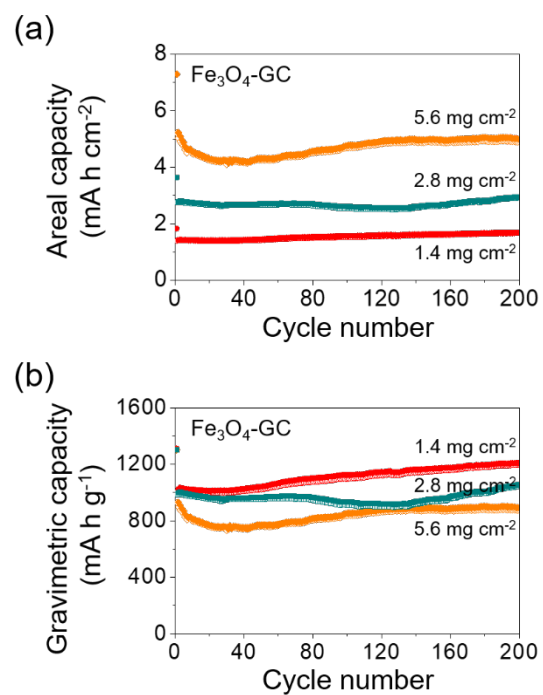

**Fig. S11.** (a) Areal and (b) gravimetric capacities of yolk-shell structured Fe<sub>3</sub>O<sub>4</sub>-GC composite microspheres at the different active materials mass loadings on the electrode.

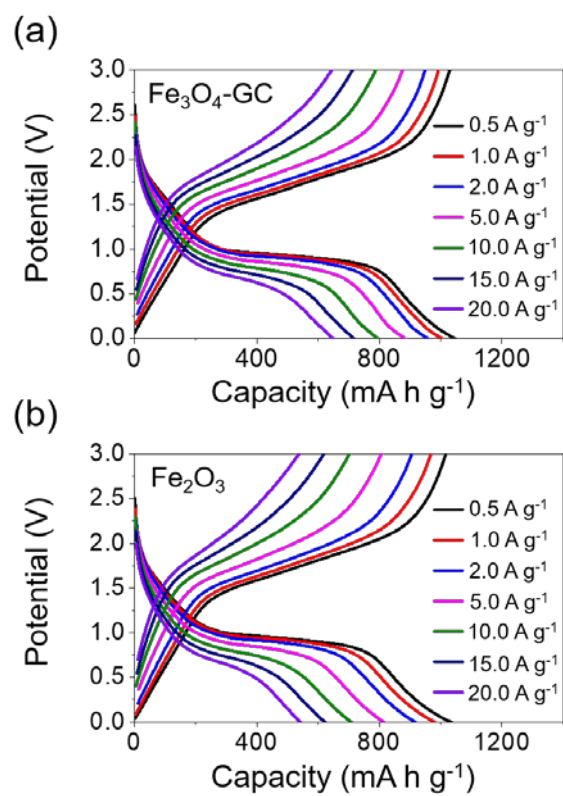

**Fig. S12.** Charge-discharge curves at different rates (0.5, 1, 2, 5, 10, 15, and 20  $\text{A g}^{-1}$ ) of yolk-shell structured  $\text{Fe}_3\text{O}_4\text{-GC}$  composite and  $\text{Fe}_2\text{O}_3$  microspheres.

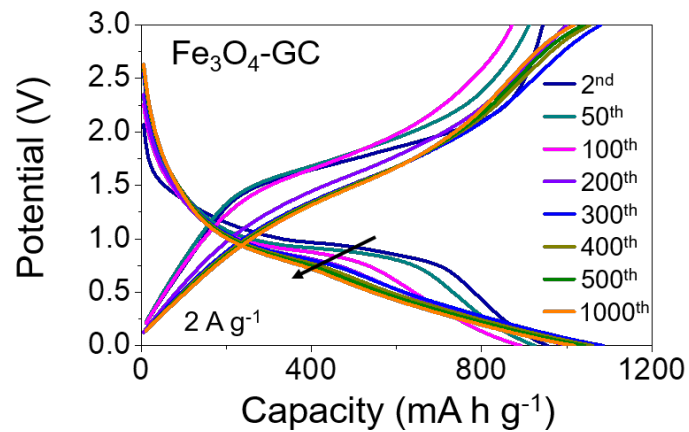

**Fig. S13.** The 2<sup>nd</sup>, 50<sup>th</sup>, 100<sup>th</sup>, 200<sup>th</sup>, 300<sup>th</sup>, 400<sup>th</sup>, 500<sup>th</sup>, and 1000<sup>th</sup> charge-discharge curves obtained during the long-term cycling test of yolk-shell structured Fe<sub>3</sub>O<sub>4</sub>-GC composite microspheres.

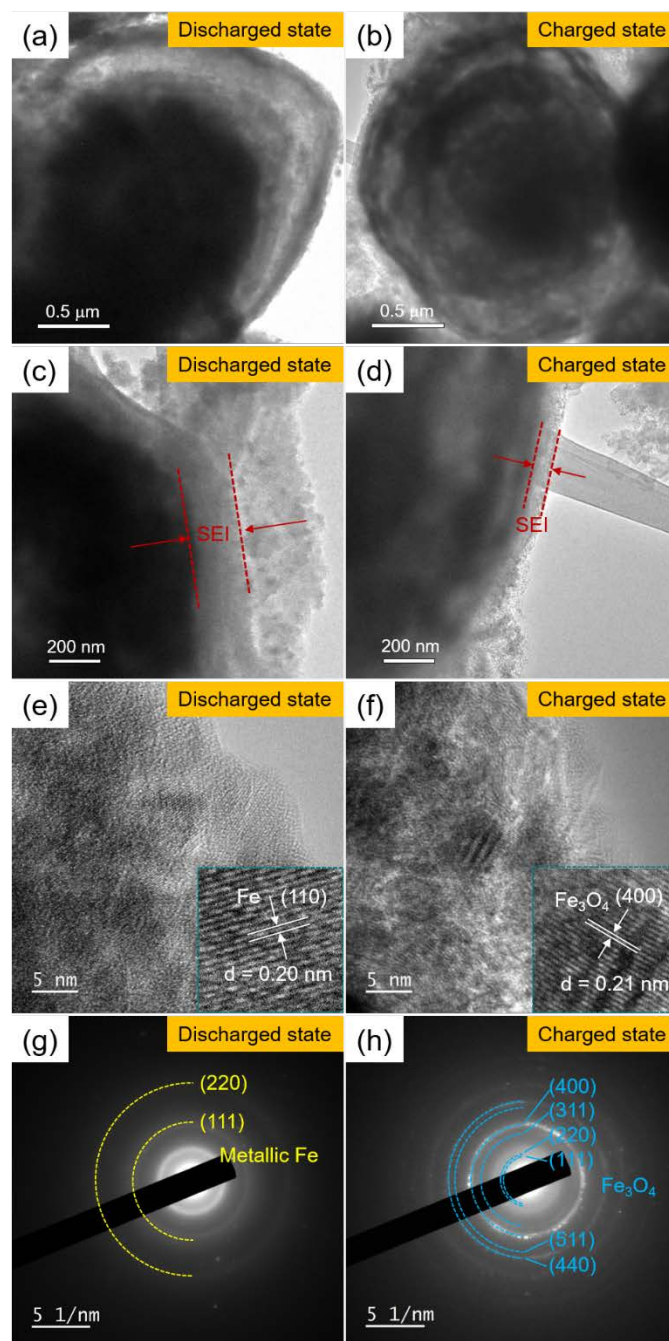

**Fig. S14.** TEM images and SAED patterns of yolk-shell structured  $\text{Fe}_3\text{O}_4$ -GC composite at fully (a,c,e,g) discharged and (b,d,f,h) charged states after 100 cycles : (a-d) TEM images, (e,f) HR-TEM images, (g,h) SAED pattern.

**Table S1.** Electrochemical properties of various Fe<sub>3</sub>O<sub>4</sub> materials applied as lithium-ion batteries reported in the previous literatures.

| Materials                                                                                                                   | Current rate                | Discharge capacity [mA h g <sup>-1</sup> ] and (cycle number) | Rate capacity [mA h g <sup>-1</sup> ] (current rate) | Ref             |
|-----------------------------------------------------------------------------------------------------------------------------|-----------------------------|---------------------------------------------------------------|------------------------------------------------------|-----------------|
| Graphene-wrapped Fe <sub>3</sub> O <sub>4</sub>                                                                             | 0.7 A g <sup>-1</sup>       | ~600 (100)                                                    | ~600 (1.75 A g <sup>-1</sup> )                       | [S1]            |
| Carbon coated Fe <sub>3</sub> O <sub>4</sub> nanospindles                                                                   | 0.4 A g <sup>-1</sup>       | 530 (80)                                                      | 190 (4.0 A g <sup>-1</sup> )                         | [S2]            |
| Carbon-encapsulated Fe <sub>3</sub> O <sub>4</sub> nanoparticles                                                            | 5.0 A g <sup>-1</sup>       | 836 (350)                                                     | 297 (20.0 A g <sup>-1</sup> )                        | [S3]            |
| Dual layers N-doped carbon@mesoporous carbon@Fe <sub>3</sub> O <sub>4</sub> nanoparticle                                    | 2.0 A g <sup>-1</sup>       | 576 (500)                                                     | 322 (5.0 A g <sup>-1</sup> )                         | [S4]            |
| Fe <sub>3</sub> O <sub>4</sub> -embedded and N-doped hierarchically porous carbon nanospheres                               | 1.0 A g <sup>-1</sup>       | 581 (400)                                                     | 290 (10.0 A g <sup>-1</sup> )                        | [S5]            |
| N-doped dual carbon-confined 3D architecture rGO/Fe <sub>3</sub> O <sub>4</sub> /AC                                         | 5.0 A g <sup>-1</sup>       | ~500 (500)                                                    | 437 (10.0 A g <sup>-1</sup> )                        | [S6]            |
| Porous Fe <sub>3</sub> O <sub>4</sub> /carbon microspheres                                                                  | 1.0 A g <sup>-1</sup>       | 746 (300)                                                     | 410 (5.0 A g <sup>-1</sup> )                         | [S7]            |
| Pomegranate-like, carbon-coated Fe <sub>3</sub> O <sub>4</sub>                                                              | 5.0 A g <sup>-1</sup>       | 520 (1000)                                                    | 416 (10.0 A g <sup>-1</sup> )                        | [S8]            |
| Neuron-inspired Fe <sub>3</sub> O <sub>4</sub> -conductive carbon                                                           | 1.0 A g <sup>-1</sup>       | 971 (1000)                                                    | 206 (8.0 A g <sup>-1</sup> )                         | [S9]            |
| Macroporous Fe <sub>3</sub> O <sub>4</sub> @C                                                                               | 2.0 A g <sup>-1</sup>       | 645 (1000)                                                    | 300 (10.0 A g <sup>-1</sup> )                        | [S10]           |
| <b>Yolk-shell-structured microsphere with multishells of hollow Fe<sub>3</sub>O<sub>4</sub> nanopowders covered with GC</b> | <b>2.0 A g<sup>-1</sup></b> | <b>1018 (1000)</b>                                            | <b>649 (20.0 A g<sup>-1</sup>)</b>                   | <b>Our work</b> |

## References

- [S1] G. Zhou, D.-W. Wang, F. Li, L. Zhang, N. Li, Z.-S. Wu, L. Wen, G. Q. Lu, H.-M. Cheng, *Chem. Mater.*, 2010, **22**, 5306-5313.
- [S2] W.-M. Zhang, X.-L. Wu, J.-S. Hu, Y.-G. Guo, L.-J. Wan, *Adv. Funct. Mater.*, 2008, **18**, 3941-3946.
- [S3] C. He, S. Wu, N. Zhao, C. Shi, E. Liu, J. Li, *ACS Nano*, 2013, **7**, 4459-4469.
- [S4] B. Zhu, G. Guo, G. Wu, Y. Zhang, A. Dong, J. Hu, D. Yang, *J. Alloys Compd.*, 2019, **775**, 776-783.
- [S5] J. Mao, D. Niu, N. Zheng, G. Jiang, W. Zhao, J. Shi, Y. Li, *ACS Sustainable Chem. Eng.*,



2019, **32**, 3424-3433.

[S6] R. Ding, J. Zhang, J. Qi, Z. Li, C. Wang, M. Chen, *ACS Appl. Mater. Interfaces*, 2018, **10**, 13470-13478.

[S7] W. Han, X. Qin, J. Wu, Q. Li, M. Liu, Y. Xia, H. Du, B. Li, F. Kang, *Nano Res.*, 2018, **11**, 892-904.

[S8] D. Han, G. Guo, Y. Yan, T. Li, B. Wang, A. Dong, *Energy Storage Mater.*, 2018, **10**, 32-39.

[S9] S.-M. Hao, Q.-J. Li, J. Qu, F. An, Y.-J. Zhang, Z.-Z. Yu, *ACS Appl. Mater. Interfaces*, 2018, **10**, 17923-17932.

[S10] Z. Yan, X. Jiang, Y. Dai, W. Xiao, X. Li, N. Du, G. He, *ACS Appl. Mater. Interfaces*, 2018, **10**, 2581-2590.
